# Supplementary material
Source: Springer Nature journal article supplement (http://www.nature.com/nature/journal/v449/n7159/extref/449160a-s1.pdf)
Supplement: 449160a-s1.pdf [file 449160a-s1.pdf]

### Box S1 Interviewing methods

To gain a comprehensive and holistic perspective, we interviewed 70 recognized experts and opinion leaders from different sectors in the developing world. Interviewees were selected on the basis of input from several sources: the Grand Challenges in Global Health initiative; the Ethical, Social and Cultural team; literature searches; and ‘snowball’ sampling (in which one interviewee recommends other knowledgeable individuals). Most interviews were carried out face to face (in Cameroon, Kenya, Nigeria, South Africa, China, India and Mexico). Some took place at international meetings (in Egypt, Canada and Japan). Certain interviews were not possible in person and were carried out by telephone. All interviews were audiotaped.

We asked participants to identify the key forces influencing the development and adoption of health biotechnologies in the developing world; to describe the effect of those forces on a particular technology; and to assess the ethical, social and cultural issues influencing the development of that technology. Participants were provided with relevant information before the interviews.

Interviews were semi-structured but kept flexible so that emerging issues could be pursued, enabling participants to share personal insights and/or issues raised by other interviewees.

When new concepts were no longer put forward by the participants, we stopped interviewing them (an approach known as saturation, which is the standard method for determining sample size in qualitative research).

More than 83 hours of interview data were collected. These data were coded and evaluated using content analysis. The resultant model was shown to the participants, who confirmed its face validity and content validity.

### Box S2 Describing the forces in the words of participants

#### SCIENCE

##### **Capacity and Infrastructure**

*“There’s a big disjuncture between what the needs are in these countries and where drug development or other biotechnologies are actually located and shaped.” – Wang Yu*

*“You can’t even begin to think about vaccines until either you’ve succeeded in delivering electricity that will run refrigerators or have solar powered refrigerators or something in the area to keep the vaccine cold.” – Anonymous participant*

##### **Collaboration**

*“Collaboration works better when local actors take the lead and help to define how to implement joint activities. They often have a greater stake in the success or failure of collaborative activities.” – Calestous Juma*

*“What we want Western participation for is to bring innovation into thinking here. Not to think for us.” – M. K. Bhan*

*“They [Western scientists] come with ready-made plans, and these don’t necessarily answer local questions.” – Gideon B. A. Okelo*

## ETHICS, SOCIETY, CULTURE

### **Community/Public Engagement**

*“You’ve got to talk to communities. There’s a danger that much of this research that is being done on technology will result in nothing because we have not understood what the community needs are.”* – Olive Shisana

*“Why is it that we are not able to push free vaccines, which are life saving, whereas this salesman walks in just once and he pushes his sales of soaps and commercial beverages in this remote village—how does he do it? Soap and beverages are advertised to universally arouse pleasurable feelings of freshness and joy [...] Go to a Health Centre and you see grotesque pictures of diseased and suffering victims, of crippled Polio victims, painful syringes, pot bellied undernourished children, etc. These Health Education posters are supposed to make you rush for immunization, Under-Five clinics, etc.!!”* – Dara Amar

### **Cultural Acceptability**

*“You may end up with this fantastic, efficacious magic bullet but if you don’t understand some of the local culture, customs, etc., then the uptake and acceptability are low.”* – Quarraisha Abdool Karim

*“Technology in Africa was introduced with colonization, and what the people of this land – of this continent – were seeing is that colonial power will bring in only those technologies which were targeting natural resources – minerals or whatever – to sustain their own economies.”*  
– Anonymous participant on the cultural impacts of a history of exploitation

*“In developing world countries you have different cultures, and what may be acceptable in the developed world is not necessarily acceptable in the developing world.”*  
– Niresh Bhagwandin

*“In typical African culture, men are always perceived as superior, and as a result you find that women do not have a voice.”* – Koleka Mlisana

## FINANCE

### **Commercialization in low resource settings**

*"[Researchers] don't move [innovation] forward as an entrepreneur, because the environment is so harsh that they wouldn't be able to commercialize their ideas."* – Krishna Ella, on business environments in India that fail to encourage entrepreneurship

*"Individuals may actually have good ideas, but they are petrified at the thought of presenting them because they don't think that the legal framework is mature enough to protect their ideas."* – Judi Wakhungu on the impacts of poor regulatory frameworks

*"People like us have realized that India provides an enormous cost advantage in process and clinical drug development. We have commercialized products like insulin and monoclonal antibodies and have forced multinational pharmaceutical companies to substantially reduce their prices. Our business strategy is about developing affordable drugs for global markets"* – Kiran Mazumdar-Shaw, on the benefits of developing bio-generics and new biologicals in India

### **Affordability**

*"The principle of justice demands that if the technology is found to be effective it should be made available at a cost that is affordable to the population on whom it was experimented."* – Vikram Patel

*"... [I]n Kenya, there is about 35%, 40% of the population living below a dollar a day, and to expect them to buy it [a new technology], they won't. It will either be the healthcare system which will have to provide, or a combination of healthcare system NGOs or WHO..."* – Asad Raja

*"If a particular technology is very expensive then, at the end of the day, the chance that the technology will be adopted and solve a particular problem is likely to be low."* – Judi Wakhungu

## POLITICS

### **Domestic Policy Environment**

*"Struggling to change the policy environment, struggling to change the legal environment to allow science to flourish...I find these are the major things that will determine...development in the third world."* – Mohamed Abdullah

*"If countries do not have technology procurement policies they do not get technologies into the market place, into their economies, and therefore we don't talk about diffusion in the national system."* – John Mugabe

*"Researchers will continue to work hard to develop and find an efficacious product...but no product will reach the people who need it if the policy makers won't support it."* – Gita Ramjee

### **Political Will**

*"We can do it. Again it comes back to, I think, political will and guts. Someone has to step up there, be the champion and say come hell or high water, this is what we're going to do."* – Patrick Tippoo

*"What shapes the development of biotechnology in developing economies is largely leadership at the political level."* – William Makgoba

TABLE S1 INTERVIEWEES PARTICIPATING IN THIS STUDY

| NAME                 | TITLE & INSTITUTION                                                                         | NAME                    | TITLE & INSTITUTION                                                                                                          |
|----------------------|---------------------------------------------------------------------------------------------|-------------------------|------------------------------------------------------------------------------------------------------------------------------|
| Mohamed Abdullah     | Aga Khan University, Nairobi, Kenya                                                         | N.K. Ganguly            | Director General, Indian Council of Medical Research, New Delhi, India                                                       |
| Stephen Gaya Agong   | Executive Director, African Academy of Sciences, Nairobi, Kenya                             | Mohamed Hassan          | Executive Director, Academy of Sciences for Developing World, Trieste, Italy                                                 |
| Khalil Ahmed         | Executive Director, Shantha Biotechnics Ltd., Hyderabad, India                              | Marian Jacobs           | Dean, Faculty of Health Sciences, Univ. of Cape Town, Rondebosch, South Africa                                               |
| Ademola Ajuwon       | Senior Lecturer & Sub-Dean, Faculty of Public Health, University of Ibadan, Ibadan, Nigeria | Gerardo Jiménez-Sánchez | General Director National Institute of Genomic Medicine, Mexico City, Mexico                                                 |
| George Alleyne       | Special Envoy of the Secretary General for HIV/AIDS in the Caribbean, United Nations        | Calestous Juma          | Director, Program on Science, Technology and Innovation, Harvard University, Cambridge, USA                                  |
| Dara Amar            | Professor & Chair, Dept of Community Health, St. John's Medical College, Bangalore, India   | Musimbi Kanyoro         | Secretary General, World YWCA, Geneva, Switzerland                                                                           |
| Niresh Bhagwandin    | Executive Manager: Strategic Research Initiatives, MRC, Cape Town, South Africa             | Quarraisha Abdool Karim | Assoc. Prof. of Public Health, University of KwaZulu-Natal, Congella, South Africa                                           |
| M.K. Bhan            | Secretary, Department of Biotechnology, New Delhi, India                                    | Salim Abdool Karim      | Director, CAPRISA, Congella, South Africa                                                                                    |
| Mpoko Bokanga        | Executive Director, African Agricultural Technology Foundation, Nairobi, Kenya              | Nathaniel Khaole        | Professor, Faculty of Health Sciences, Univ. of Cape Town, Mowbray, South Africa                                             |
| Swami Brahmeshananda | Secretary, Ramakrishna Mission Ashrama, Chandigarh, India                                   | Bruno Kilunga Kubata    | Network Director, BioSciences Eastern and Central Africa, Nairobi, Kenya                                                     |
| Zhijie Chang         | Professor, School of Medicine, Tsinghua University, Beijing, China                          | Rajesh Kumar            | Professor & Chair, Dept of Community Medicine, Post Graduate Institute for Medical Education and Research, Chandigarh, India |
| Mingzhe Chen         | Professor of Medicine, Peking University, Beijing, China                                    | Ed Liu                  | Executive Director, Genome Institute of Singapore, Singapore                                                                 |
| Mushtaque Chowdhury  | Deputy Executive Director, BRAC, Dhaka, Bangladesh                                          | William Makgoba         | Vice Chancellor, University of KwaZulu-Natal, Durban, South Africa                                                           |

|                                |                                                                                                                                              |                     |                                                                                   |
|--------------------------------|----------------------------------------------------------------------------------------------------------------------------------------------|---------------------|-----------------------------------------------------------------------------------|
| John Clemens                   | Director General, International Vaccine Institute, Seoul, Republic of Korea                                                                  | R.A. Mashelkar      | Director General, Council of Scientific and Industrial Research, New Delhi, India |
| Nares Damrongchai              | Executive Director, APEC Center for Technology Foresight, Bangkok, Thailand                                                                  | Kiran Mazumdar-Shaw | Chair and Managing Director, Biocon Ltd., Bangalore, India                        |
| Krishna Ella                   | Chairman & Managing Director, Bharat Biotech Ltd., Hyderabad, India                                                                          | John McDermott      | Deputy Director General, Int'l Livestock Research Institute, Nairobi, Kenya       |
| Peter Folb                     | Chief Specialist Scientist, Medical Research Council of South Africa, Cape Town, South Africa                                                | Koleka Mlisana      | Project Director, CAPRISA, Durban, South Africa                                   |
| Farhat Moazam                  | Prof. & Chair, Centre of Biomedical Ethics and Culture, SIUT, Karachi, Pakistan                                                              | Olive Shisana       | President & CEO, Human Sciences Research Council, Pretoria, South Africa          |
| Villoo Morawala-Patel          | Founder & CEO, Avesthagen Technologies, Bangalore, India                                                                                     | Fang-Lin Sun        | School of Medicine, Tsinghua University, Beijing, China                           |
| Carlos Morel                   | Former TDR Director, Rio de Janeiro, Brazil                                                                                                  | Xuehai Tan          | CEO and President, HD Biosciences Corp. Ltd., Shanghai, China                     |
| John Mugabe                    | Advisor, New Partnership for Africa's Development, Pretoria, South Africa                                                                    | Godfrey Tangwa      | Associate Prof. of Philosophy, University of Yaounde, Yaounde, Cameroon           |
| James Ochanda                  | Associate Professor in the Department of Biochemistry, University of Nairobi, and Coordinator Biotechnology Laboratory Unit., Nairobi, Kenya | Patrick Tippoo      | Research & Development Manager, Biovac Institute, Cape Town, South Africa         |
| Gideon B.A. Okelo              | Professor of Medicine, University of Nairobi, Nairobi, Kenya                                                                                 | Cristina Torres     | Coordinator, FERCAP-SIDCER, Manila, Phillipines                                   |
| Onesmo ole-MoiYoi              | Research Director, Int'l Centre of Insect Physiology & Ecology, Nairobi, Kenya                                                               | V. K. Vinayak       | President, Biopharmaceutical R&D, Panacea Biotech Ltd., New Delhi, India          |
| Father Sebastian Ousepparampil | Director, Catholic Health Association of India, Secunderabad, India                                                                          | David Wafula        | Research Fellow, African Centre for Technology Studies (ACTS), Nairobi, Kenya     |

|                   |                                                                                                                              |                    |                                                                                                                            |
|-------------------|------------------------------------------------------------------------------------------------------------------------------|--------------------|----------------------------------------------------------------------------------------------------------------------------|
| Vikram Patel      | Wellcome Trust Senior Clinical Research Fellow, London School of Hygiene & Tropical Medicine & Sangath, Porvorim, Goa, India | Judi Wakhungu      | Executive Director, African Center for Technology Studies, Nairobi, Kenya                                                  |
| Adi Paterson      | Group Executive, Dept. of Science & Technology, Pretoria, South Africa                                                       | David Walwyn       | Group Manager, Council for Scientific & Industrial Research, Cape Town, South Africa                                       |
| You-Lin Qiao      | Chief & Professor, Dept of Cancer Epidemiology, Chinese Academy of Medical Sciences, Beijing, China                          | Florence Wambugu   | CEO, Africa Harvest Biotech Foundation International, Nairobi, Kenya                                                       |
| Atta-ur Rahman    | President, Pakistan Academy of Sciences, Islamabad, Pakistan                                                                 | Carolyn Williamson | Professor, Institute of Infectious Disease, Univ. of Cape Town, Cape Town, South Africa                                    |
| Asad Raja         | Professor & Chair, Dept of Surgery, Aga Khan University, Nairobi, Kenya                                                      | Rosemary Wolson    | Intellectual Property Manager, Council for Scientific and Industrial Research (CSIR) South Africa, Cape Town, South Africa |
| Rajkumar Ramesar  | Professor & Head, Division of Human Genetics, University of Cape Town, Cape Town, South Africa                               | Lan Xue            | Professor & Associate Dean, School of Public Policy and Management, Tsinghua Univ., Beijing, China                         |
| Gita Ramjee       | Director, HIV Research MRC, Durban, South Africa                                                                             | Huanming Yang      | Professor and Director, Beijing Genomics Institute, Beijing, China                                                         |
| Jaime Sepulveda   | Coordinator of the National Institute of Health in Mexico, Mexico City, Mexico                                               | Wang Yu            | Director, Chinese Center for Disease Control and Prevention, Beijing, China                                                |
| Ismail Serageldin | Former VP of World Bank; Director, Library of Alexandria, Alexandria, Egypt                                                  | Yongyuth Yuthavong | President, Thai Academy of Science and Technology, Bangkok, Thailand                                                       |
| Yiming Shao       | Chinese AIDS Expert, Beijing, China                                                                                          | Xiaomei Zhai       | Executive Director, Research Centre for Bioethics, Peking Union Medical College, Beijing, China                            |

**Table S2 Participant details**

|               |  | %  |
|---------------|--|----|
| <b>Region</b> |  |    |
| AFRO          |  | 49 |
| SEARO         |  | 27 |
| WPRO          |  | 14 |
| AMRO          |  | 6  |
| EMRO          |  | 4  |
| EURO          |  | 0  |
| <b>Sector</b> |  |    |
| Academia      |  | 49 |
| Government    |  | 26 |
| Civil society |  | 16 |
| Industry      |  | 10 |
| <b>Gender</b> |  |    |
| Male          |  | 79 |
| Female        |  | 21 |

**Table S3 Analysis of participants' comments**

| <b>Force</b>                               | <b>Number contributing to discussion (%)</b> |
|--------------------------------------------|----------------------------------------------|
| <b>Science</b>                             |                                              |
| Scientific capacity and infrastructure     | <b>71*</b>                                   |
| Collaboration                              | <b>67</b>                                    |
| <b>Ethics, society, and culture</b>        |                                              |
| Community/public engagement                | <b>79*</b>                                   |
| Cultural acceptability                     | <b>74</b>                                    |
| <b>Finance</b>                             |                                              |
| Affordability                              | <b>81**</b>                                  |
| Commercialization in low-resource settings | <b>67</b>                                    |
| <b>Politics</b>                            |                                              |
| Domestic policy environment                | <b>34</b>                                    |
| Political will                             | <b>44</b>                                    |

\* Discussed one or both topics.

\*\*Figure includes intellectual property and regulatory issues.
